# Supplementary material for: Evidence of Effectiveness of Health Care Professionals Using Handheld Computers: A Scoping Review of Systematic Reviews
Source: J Med Internet Res. 2013 Oct 28;15(10):e212. doi: 10.2196/jmir.2530 (PMC3841346; doi:10.2196/jmir.2530)
Supplement: Supplementary file 1 [file jmir_v15i10e212_app1.pdf]

**Title:**

Hand-held computers - Reviews

**Search summary:**

We searched the Cochrane Database of Systematic Reviews and the Database of Abstracts of Reviews of Effectiveness [The Cochrane Library, Wiley] (Issue 11, 2012), Medline [OvidSP] (1946 – , In process), Embase [OvidSP] (1974 – ), CINAHL [EbscoHOST] (1980 – ), PsycINFO [OvidSP] (1967 - ), Global Health [OvidSP] (1973 - ) and AMED [OvidSP] (1985 - ). Searches were conducted on 7<sup>th</sup> June 2012 & 11<sup>th</sup> December 2012

**Search methods:**

| Database name:                                                                                     | Interface:              | Year range:         | Hits: |
|----------------------------------------------------------------------------------------------------|-------------------------|---------------------|-------|
| AMED                                                                                               | OvidSP                  | 1985 -              | 20    |
| CINAHL                                                                                             | EbscoHOST               | 1980 –              | 29    |
| CDSR & DARE                                                                                        | Cochrane Library, Wiley | Issue 11. 2012      | 12    |
| Embase                                                                                             | OvidSP                  | 1974 –              | 312   |
| Global Health                                                                                      | OvidSP                  | 1973 -              | 4     |
| Medline                                                                                            | OvidSP                  | 1946 - , In process | 286   |
| PsycINFO                                                                                           | OvidSP                  | 1967 –              | 40    |
| Total number of records retrieved = 703<br>Number of duplicates removed = 197<br>Final total = 506 |                         |                     |       |
| <b>Limits:</b><br><br>Publication type: Systematic reviews                                         |                         |                     |       |



## Search strategies:

**AMED** (OvidSP) [1985 - ] – 7<sup>th</sup> June 2012 & 11<sup>th</sup> December 2012

|    |                                                                                                     |       |
|----|-----------------------------------------------------------------------------------------------------|-------|
| 1  | exp health personnel/                                                                               | 3858  |
| 2  | clinician*1.ti,ab.                                                                                  | 3959  |
| 3  | (clinical adj3 (staff or personnel or officer*1 or worker*1)).ti,ab.                                | 135   |
| 4  | (medical adj3 (staff or personnel or officer*1 or worker*1 or professional*)).ti,ab.                | 487   |
| 5  | ((health or healthcare) adj3 (staff or personnel or officer* or worker*1 or professional*1)).ti,ab. | 3293  |
| 6  | (physician*1 or doctor*1 or surgeon*1).ti,ab.                                                       | 8036  |
| 7  | nurse*1.ti,ab.                                                                                      | 4330  |
| 8  | practitioner*1.ti,ab.                                                                               | 4558  |
| 9  | (physical therapist*1 or physiotherapist*1).ti,ab.                                                  | 4024  |
| 10 | rehabilitation therapist*1.ti,ab.                                                                   | 40    |
| 11 | occupational therapist*1.ti,ab.                                                                     | 2863  |
| 12 | ((speech or language) adj3 therapist*).ti,ab.                                                       | 232   |
| 13 | 1 or 2 or 3 or 4 or 5 or 6 or 7 or 8 or 9 or 10 or 11 or 12                                         | 28450 |
| 14 | (mhealth* or m-health* or mobile health*).ti,ab.                                                    | 2     |
| 15 | (handheld adj3 (device* or computer* or technolog* or PC)).ti,ab.                                   | 10    |
| 16 | (hand-held adj3 (device* or computer* or technolog* or PC)).ti,ab.                                  | 19    |
| 17 | (tablet adj3 (device* or computer* or technolog* or PC)).ti,ab.                                     | 6     |

|        |                                                                                        |    |
|--------|----------------------------------------------------------------------------------------|----|
| 1<br>8 | (slate adj3 tablet*).ti,ab.                                                            | 1  |
| 1<br>9 | (android adj3 tablet*).ti,ab.                                                          | 0  |
| 2<br>0 | (palm*1 adj3 (device* or computer* or pc)).ti,ab.                                      | 10 |
| 2<br>1 | (pocket* adj3 (device* or computer* or pc)).ti,ab.                                     | 10 |
| 2<br>2 | (mobile adj3 (computer* or PC)).ti,ab.                                                 | 5  |
| 2<br>3 | (portable adj3 (computer* or PC)).ti,ab.                                               | 13 |
| 2<br>4 | (palm pilot* or palmpilot*).ti,ab.                                                     | 1  |
| 2<br>5 | (smartbook* or smart-book*).ti,ab.                                                     | 0  |
| 2<br>6 | ipad*.ti,ab.                                                                           | 3  |
| 2<br>7 | i-pad*.ti,ab.                                                                          | 0  |
| 2<br>8 | galaxy tab.ti,ab.                                                                      | 0  |
| 2<br>9 | kindle fire.ti,ab.                                                                     | 0  |
| 3<br>0 | playbook.ti,ab.                                                                        | 0  |
| 3<br>1 | ((touchscreen or touch screen) adj3 (computer* or PC or technolog* or device*)).ti,ab. | 9  |
| 3<br>2 | (smartphone* or smart phone*).ti,ab.                                                   | 9  |
| 3<br>3 | iphone*.ti,ab.                                                                         | 0  |

|        |                                                                                    |     |
|--------|------------------------------------------------------------------------------------|-----|
| 3<br>4 | i-phone*.ti,ab.                                                                    | 0   |
| 3<br>5 | (blackberry or black-berry).ti,ab.                                                 | 8   |
| 3<br>6 | (android adj3 (phone* or cellphone* or telephone* or device* or mobile*)).ti,ab.   | 1   |
| 3<br>7 | (google adj3 (phone* or cellphone* or telephone* or device* or mobile*)).ti,ab.    | 0   |
| 3<br>8 | (nexus one adj3 (phone* or cellphone* or telephone* or device* or mobile*)).ti,ab. | 0   |
| 3<br>9 | (google adj3 android).ti,ab.                                                       | 0   |
| 4<br>0 | (ipod touch or i-pod touch).ti,ab.                                                 | 1   |
| 4<br>1 | ((touchscreen or touch screen) adj3 (phone* or cellphone* or telephone*)).ti,ab.   | 0   |
| 4<br>2 | apps.ti.                                                                           | 0   |
| 4<br>3 | or/14-42                                                                           | 101 |
| 4<br>4 | ((cell or cellular) adj3 (phone* or telephone*)).ti,ab.                            | 30  |
| 4<br>5 | cellphone*.ti,ab.                                                                  | 3   |
| 4<br>6 | (mobile adj3 (phone* or telephone* or device* or technolog*)).ti,ab.               | 49  |
| 4<br>7 | digital assistant*.ti,ab.                                                          | 21  |
| 4<br>8 | pda*.ti,ab.                                                                        | 44  |
| 4<br>9 | 44 or 45 or 46 or 47 or 48                                                         | 123 |

|        |                                           |      |
|--------|-------------------------------------------|------|
| 5<br>0 | internet.ti,ab.                           | 620  |
| 5<br>1 | (online or on-line).ti,ab.                | 2690 |
| 5<br>2 | (web* or www).ti,ab.                      | 900  |
| 5<br>3 | (wireless or wifi or wi-fi or wap).ti,ab. | 53   |
| 5<br>4 | (bluetooth or blue tooth).ti,ab.          | 2    |
| 5<br>5 | 50 or 51 or 52 or 53 or 54                | 3917 |
| 5<br>6 | 49 and 55                                 | 15   |
| 5<br>7 | 43 or 56                                  | 116  |
| 5<br>8 | 13 and 57                                 | 20   |

**CINAHL** (EBSCOHost) (1980 - ) – 7<sup>th</sup> June 2012 & 11<sup>th</sup> December 2012

S6  
3 S59 AND S62

S6  
2 S60 OR S61

S6  
1 PT review OR PT systematic review

S6  
0 TI meta-analysis OR AB meta-analysis OR MW meta-analysis

S5  
9 S14 and S58

S5 S43 or S57

8

S5  
7 S49 and S56

S5  
6 S50 or S51 or S52 or S53 or S54 or S55

S5  
5 TI ( bluetooth or blue tooth ) OR AB ( bluetooth or blue tooth )

S5  
4 TI ( wireless or wifi or wi-fi or wap ) OR AB ( wireless or wifi or wi-fi or wap )

S5  
3 TI ( web\* or www ) OR AB ( web\* or www )

S5  
2 TI ( online or on-line ) OR AB ( online or on-line )

S5  
1 TI internet OR AB internet

S5  
0 (MH "Internet")

S4  
9 S44 or S45 or S46 or S47 or S48

S4  
8 TI ( digital assistant\* or pda ) OR AB ( digital assistant\* or pda )

S4  
7 TI ( mobile n3 phone\* or mobile n3 telephone\* or mobile n3 device\* or mobile n3 technolog\* ) OR AB ( mobile n3 phone\* or mobile n3 telephone\* or mobile n3 device\* or mobile n3 technolog\* )

S4  
6 TI cellphone\* OR AB cellphone\*

S4  
5 TI ( cell n3 phone\* or cell n3 telephone\* or cellular n3 phone\* or cellular n3 telephone\* ) OR AB ( cell n3 phone\* or cell n3 telephone\* or cellular n3 phone\* or cellular n3 telephone\* )

S4  
4 (MH "Telephone") AND (MH "Wireless Communications")

S4  
3 S15 or S16 or S17 or S18 or S19 or S20 or S21 or S22 or S23 or S24 or S25 or S26 or S27 or S28 or S29 or S30 or S31 or S32 or S33 or S34 or S35 or S36 or S37 or S38 or S39 or S40 or S41 or S42

S4 TI apps OR AB apps

2

TI ( touch-screen n3 phone\* or touch-screen n3 telephone\* or touch-screen n3  
S4 cellphone\* or touch-screen n3 device\* or touch-screen n3 mobile ) OR AB ( touch-  
1 screen n3 phone\* or touch-screen n3 telephone\* or touch-screen n3 cellphone\* or  
touch-screen n3 device\* or touch-screen n3 mobile )

TI ( touchscreen n3 phone\* or touchscreen n3 telephone\* or touchscreen n3  
S4 cellphone\* or touchscreen n3 device\* or touchscreen n3 mobile ) OR AB  
0 ( touchscreen n3 phone\* or touchscreen n3 telephone\* or touchscreen n3  
cellphone\* or touchscreen n3 device\* or touchscreen n3 mobile )

S3  
9 TI ( ipod touch or i-pod touch ) OR AB ( ipod touch or i-pod touch )

S3  
8 TI google n3 android OR AB google n3 android

TI ( nexus one n3 phone\* or nexus one n3 telephone\* or nexus one n3 cellphone\*  
S3 or nexus one n3 device\* or nexus one n3 mobile ) OR AB ( nexus one n3 phone\*  
7 or nexus one n3 telephone\* or nexus one n3 cellphone\* or nexus one n3 device\*  
or nexus one n3 mobile )

TI ( google n3 phone\* or google n3 telephone\* or google n3 cellphone\* or google  
S3 n3 device\* or google n3 mobile ) OR AB ( google n3 phone\* or google n3  
6 telephone\* or google n3 cellphone\* or google n3 device\* or google n3 mobile )

TI ( android n3 phone\* or android n3 telephone\* or android n3 cellphone\* or  
S3 android n3 device\* or android n3 mobile ) OR AB ( android n3 phone\* or android  
5 n3 telephone\* or android n3 cellphone\* or android n3 device\* or android n3  
mobile )

S3  
4 TI ( blackberry or black-berry ) OR AB ( blackberry or black-berry )

S3  
3 TI ( iphone\* or i-phone\* ) OR AB ( iphone\* or i-phone\* )

TI ( touch-screen n3 computer\* or touch-screen n3 pc or touch-screen n3  
S3 technolog\* or touch-screen n3 device\* ) OR AB ( touch-screen n3 computer\* or  
2 touch-screen n3 pc or touch-screen n3 technolog\* or touch-screen n3 device\* )

TI ( touchscreen n3 computer\* or touchscreen n3 pc or touchscreen n3  
S3 technolog\* or touchscreen n3 device\* ) OR AB ( touchscreen n3 computer\* or  
1 touchscreen n3 pc or touchscreen n3 technolog\* or touchscreen n3 device\* )

S3 TI kindle fire OR AB kindle fire

0

S2  
9 TI galaxy tab OR AB galaxy tab

S2  
8 TI ( ipad\* or i-pad\* ) OR AB ( ipad\* or i-pad\* )

S2  
7 TI ( smartbook\* or smart-book\* ) OR AB ( smartbook\* or smart-book\* )

S2  
6 TI ( palm pilot\* or palmpilot ) OR AB ( palm pilot\* or palmpilot )

S2 TI ( portable n3 computer\* or portable n3 pc ) OR AB ( portable n3 computer\* or  
5 portable n3 pc )

S2  
4 TI ( mobile computer\* or mobile pc ) OR AB ( mobile computer\* or mobile pc )

S2 TI ( pocket n3 device\* or pocket n3 computer\* or pocket n3 pc ) OR AB ( pocket  
3 n3 device\* or pocket n3 computer\* or pocket n3 pc )

S2 TI ( palm\* n3 device\* or palm\* n3 computer\* or palm\* n3 pc ) OR AB ( palm\* n3  
2 device\* or palm\* n3 computer\* or palm\* n3 pc )

S2  
1 TI android n3 tablet\* OR AB android n3 tablet\*

S2  
0 TI slate n3 tablet\* OR AB slate n3 tablet\*

S1  
9 TI ( tablet n3 device\* or tablet n3 computer\* or tablet technolog\* or tablet n3 pc )  
OR AB ( tablet n3 device\* or tablet n3 computer\* or tablet technolog\* or tablet  
n3 pc )

S1  
8 TI ( hand-held n3 device\* or hand-held n3 computer\* or hand-held technolog\* or  
hand-held n3 pc ) OR AB ( hand-held n3 device\* or hand-held n3 computer\* or  
hand-held technolog\* or hand-held n3 pc )

S1  
7 TI ( handheld n3 device\* or handheld n3 computer\* or handheld technolog\* or  
handheld n3 pc ) OR AB ( handheld n3 device\* or handheld n3 computer\* or  
handheld technolog\* or handheld n3 pc )

S1 TI ( mhealth\* or m-health\* or mobile health\* ) OR AB ( mhealth\* or m-health\*  
6 or mobile health\* )

S1  
5 (MH "Computers, Hand-Held")

S1 S1 or S2 or S3 or S4 or S5 or S6 or S7 or S8 or S9 or S10 or S11 or S12 or S13

4

S1 TI ( speech therapist\* or language therapist\* ) OR AB ( speech therapist\* or  
3 language therapist\* )

S1  
2 TI occupational therapist\* OR AB occupational therapist\*

S1  
1 TI rehabilitation therapist\* OR AB rehabilitation therapist\*

S1 TI ( physical therapist\* or physiotherapist\* ) OR AB ( physical therapist\* or  
0 physiotherapist\* )

S9 TI practitioner\* OR AB practitioner\*

S8 TI nurse\* OR AB nurse\*

S7 TI ( physician\* or doctor\* or surgeon\* ) OR AB ( physician\* or doctor\* or  
surgeon\* )

TI ( healthcare n3 staff or healthcare n3 personnel or healthcare n3 officer\* or  
S6 healthcare n3 worker\* or healthcare n3 professional ) OR AB ( healthcare n3  
staff or healthcare n3 personnel or healthcare n3 officer\* or healthcare n3  
worker\* or healthcare n3 professional )

TI ( health n3 staff or health n3 personnel or health n3 officer\* or health n3  
S5 worker\* or health n3 professional ) OR AB ( health n3 staff or health n3  
personnel or health n3 officer\* or health n3 worker\* or health n3 professional )

TI ( medical n3 staff or medical n3 personnel or medical n3 officer\* or medical  
S4 n3 worker\* or medical n3 professional ) OR AB ( medical n3 staff or medical n3  
personnel or medical n3 officer\* or medical n3 worker\* or medical n3  
professional )

TI ( clinical n3 staff or clinical n3 personnel or clinical n3 officer\* or clinical n3  
S3 worker\* ) OR AB ( clinical n3 staff or clinical n3 personnel or clinical n3 officer\*  
or clinical n3 worker\* )

S2 TI ( clinician or clinicians ) OR AB ( clinician or clinicians )

S1 (MH "Health Personnel+")

- #1 MeSH descriptor Health Personnel explode all trees 4532
- #2 MeSH descriptor Health Occupations explode all trees 13691
- #3 (clinician\*):ti,ab,kw 5215
- #4 (clinical near3 (staff or personnel or officer\* or worker\*)):ti,ab,kw 406
- #5 (medical near3 (staff or personnel or officer\* or worker\* or professional\*)):ti,ab,kw 914
- #6 ((health or healthcare) near3 (staff or personnel or officer\* or worker\* or professional\*)):ti,ab,kw 4354
- #7 (physician\* or doctor\* or surgeon\*):ti,ab,kw 19262
- #8 (nurse\*):ti,ab,kw 7850
- #9 (practitioner\*):ti,ab,kw 4332
- #10 (physical therapist\* or physiotherapist\*):ti,ab,kw 1044
- #11 (rehabilitation therapist\*):ti,ab,kw 227
- #12 (occupational therapist\*):ti,ab,kw 220
- #13 ((speech or language) near3 therapist\*):ti,ab,kw 53
- #14 (#1 OR #2 OR #3 OR #4 OR #5 OR #6 OR #7 OR #8 OR #9 OR #10 OR #11 OR #12 OR #13) 46408
- #15 MeSH descriptor Computers, Handheld explode all trees 103
- #16 (mhealth\* or m-health\* or mobile health\*):ti,ab,kw 285
- #17 (handheld near3 (device\* or computer\* or technolog\* or PC)):ti,ab,kw 152
- #18 (hand-held near3 (device\* or computer\* or technolog\* or PC)):ti,ab,kw 80
- #19 (tablet near3 (device\* or computer\* or technolog\* or PC)):ti,ab,kw 36
- #20 (slate near3 tablet\*):ti,ab,kw 0
- #21 (android near3 tablet\*):ti,ab,kw 0
- #22 (palm\* near3 (device\* or computer\* or pc)):ti,ab,kw 25
- #23 (pocket\* near3 (device\* or computer\* or pc)):ti,ab,kw 27
- #24 (mobile near3 (computer\* or PC)):ti,ab,kw 10
- #25 (portable near3 (computer\* or PC)):ti,ab,kw 17
- #26 (palm pilot\* or palmpilot\*):ti,ab,kw 9
- #27 (smartbook\* or smart-book\*):ti,ab,kw 0
- #28 (ipad\*):ti,ab,kw 0
- #29 (i-pad\*):ti,ab,kw 0
- #30 (galaxy tab):ti,ab,kw 0
- #31 (kindle fire):ti,ab,kw 0
- #32 (playbook):ti,ab,kw 0
- #33 ((touchscreen or touch screen) near3 (computer\* or PC or technolog\* or

device\*)):ti,ab,kw 48

#34 (smartphone\* or smart phone\*):ti,ab,kw 7

#35 (iphone\* or i-phone\*):ti,ab,kw 0

#36 (blackberry or black-berry):ti,ab,kw 6

#37 (android near3 (phone\* or cellphone\* or telephone\* or device\* or mobile\*)):ti,ab,kw 0

#38 (google near3 (phone\* or cellphone\* or telephone\* or device\* or mobile\*)):ti,ab,kw 0

#39 (nexus one near3 (phone\* or cellphone\* or telephone\* or device\* or mobile\*)):ti,ab,kw 0

#40 (google near3 android):ti,ab,kw 0

#41 (ipod touch or i-pod touch):ti,ab,kw 1

#42 ((touchscreen or touch screen) near3 (phone\* or cellphone\* or telephone\*)):ti,ab,kw 2

#43 (apps):ti,ab,kw 9

#44 (#15 OR #16 OR #17 OR #18 OR #19 OR #20 OR #21 OR #23 OR #24 OR #25 OR #26 OR #27 OR #28 OR #29 OR #30 OR #31 OR #32 OR #33 OR #34 OR #35 OR #36 OR #37 OR #38 OR #39 OR #40 OR #41 OR #42 OR #43) 642

#45 MeSH descriptor Cellular Phone explode all trees 186

#46 ((cell or cellular) near3 (phone\* or telephone\*)):ti,ab,kw 243

#47 (cellphone\*):ti,ab,kw 3

#48 (mobile near3 (phone\* or telephone\* or device\* or technolog\*)):ti,ab,kw 212

#49 (digital assistant\*):ti,ab,kw 81

#50 (pda\*):ti,ab,kw 286

#51 (#45 OR #46 OR #47 OR #48 OR #49 OR #50) 633

#52 MeSH descriptor Internet explode all trees 1191

#53 MeSH descriptor Wireless Technology explode all trees 4

#54 (internet):ti,ab,kw 2492

#55 (online or on-line):ti,ab,kw 1603

#56 (web\* or www):ti,ab,kw 3613

#57 (wireless or wifi or wi-fi or wap):ti,ab,kw 107

#58 (bluetooth or blue tooth):ti,ab,kw 129

#59 (#52 OR #53 OR #54 OR #55 OR #56 OR #57 OR #58) 6228

#60 (#51 AND #59) 90

#61 (#44 OR #60) 703

#62 (#14 AND #61)

**Embase (OvidSP) (1974 - ) – 7<sup>th</sup> June 2012 & 11<sup>th</sup> December 2012**

|    |                                                                                                     |        |
|----|-----------------------------------------------------------------------------------------------------|--------|
| 1  | exp health care personnel/                                                                          | 772226 |
| 2  | clinician*1.ti,ab.                                                                                  | 143842 |
| 3  | (clinical adj3 (staff or personnel or officer*1 or worker*1)).ti,ab.                                | 5248   |
| 4  | (medical adj3 (staff or personnel or officer*1 or worker*1 or professional*)).ti,ab.                | 31885  |
| 5  | ((health or healthcare) adj3 (staff or personnel or officer* or worker*1 or professional*1)).ti,ab. | 100264 |
| 6  | (physician*1 or doctor*1 or surgeon*1).ti,ab.                                                       | 575966 |
| 7  | nurse*1.ti,ab.                                                                                      | 193433 |
| 8  | practitioner*1.ti,ab.                                                                               | 111348 |
| 9  | (physical therapist*1 or physiotherapist*1).ti,ab.                                                  | 10507  |
| 10 | rehabilitation therapist*1.ti,ab.                                                                   | 161    |
| 11 | occupational therapist*1.ti,ab.                                                                     | 5354   |
| 12 | ((speech or language) adj3 therapist*).ti,ab.                                                       | 1885   |
| 13 | 1 or 2 or 3 or 4 or 5 or 6 or 7 or 8 or 9 or 10 or 11 or 12                                         | 147902 |
| 14 | (mhealth* or m-health* or mobile health*).ti,ab.                                                    | 3      |
| 15 | (handheld adj3 (device* or computer* or technolog* or PC)).ti,ab.                                   | 404    |
| 16 | (hand-held adj3 (device* or computer* or technolog* or PC)).ti,ab.                                  | 1019   |
| 17 | (tablet adj3 (device* or computer* or technolog* or PC)).ti,ab.                                     | 849    |
| 18 |                                                                                                     | 436    |

|        |                                                                                        |     |
|--------|----------------------------------------------------------------------------------------|-----|
| 1<br>8 | (slate adj3 tablet*).ti,ab.                                                            | 3   |
| 1<br>9 | (android adj3 tablet*).ti,ab.                                                          | 6   |
| 2<br>0 | (palm*1 adj3 (device* or computer* or pc)).ti,ab.                                      | 140 |
| 2<br>1 | (pocket* adj3 (device* or computer* or pc)).ti,ab.                                     | 428 |
| 2<br>2 | (mobile adj3 (computer* or PC)).ti,ab.                                                 | 247 |
| 2<br>3 | (portable adj3 (computer* or PC)).ti,ab.                                               | 414 |
| 2<br>4 | (palm pilot* or palmpilot*).ti,ab.                                                     | 56  |
| 2<br>5 | (smartbook* or smart-book*).ti,ab.                                                     | 1   |
| 2<br>6 | ipad*.ti,ab.                                                                           | 349 |
| 2<br>7 | i-pad*.ti,ab.                                                                          | 30  |
| 2<br>8 | galaxy tab.ti,ab.                                                                      | 0   |
| 2<br>9 | kindle fire.ti,ab.                                                                     | 0   |
| 3<br>0 | playbook.ti,ab.                                                                        | 27  |
| 3<br>1 | ((touchscreen or touch screen) adj3 (computer* or PC or technolog* or device*)).ti,ab. | 357 |
| 3<br>2 | (smartphone* or smart phone*).ti,ab.                                                   | 588 |
| 3<br>3 | iphone*.ti,ab.                                                                         | 235 |

|        |                                                                                    |      |
|--------|------------------------------------------------------------------------------------|------|
| 3<br>4 | i-phone*.ti,ab.                                                                    | 17   |
| 3<br>5 | (blackberry or black-berry).ti,ab.                                                 | 330  |
| 3<br>6 | (android adj3 (phone* or cellphone* or telephone* or device* or mobile*)).ti,ab.   | 18   |
| 3<br>7 | (google adj3 (phone* or cellphone* or telephone* or device* or mobile*)).ti,ab.    | 7    |
| 3<br>8 | (nexus one adj3 (phone* or cellphone* or telephone* or device* or mobile*)).ti,ab. | 0    |
| 3<br>9 | (google adj3 android).ti,ab.                                                       | 4    |
| 4<br>0 | (ipod touch or i-pod touch).ti,ab.                                                 | 44   |
| 4<br>1 | ((touchscreen or touch screen) adj3 (phone* or cellphone* or telephone*)).ti,ab.   | 7    |
| 4<br>2 | apps.ti.                                                                           | 90   |
| 4<br>3 | or/14-42                                                                           | 5495 |
| 4<br>4 | personal digital assistant/ or mobile phone/                                       | 5979 |
| 4<br>5 | ((cell or cellular) adj3 (phone* or telephone*)).ti,ab.                            | 2145 |
| 4<br>6 | cellphone*.ti,ab.                                                                  | 75   |
| 4<br>7 | (mobile adj3 (phone* or telephone* or device* or technolog*)).ti,ab.               | 4193 |
| 4<br>8 | digital assistant*.ti,ab.                                                          | 1009 |
| 4<br>9 | pda*.ti,ab.                                                                        | 9774 |

|        |                                           |             |
|--------|-------------------------------------------|-------------|
| 5<br>0 | 44 or 45 or 46 or 47 or 48 or 49          | 17756       |
| 5<br>1 | Internet/                                 | 66218       |
| 5<br>2 | internet.ti,ab.                           | 31508       |
| 5<br>3 | (online or on-line).ti,ab.                | 61971       |
| 5<br>4 | (web* or www).ti,ab.                      | 73292       |
| 5<br>5 | (wireless or wifi or wi-fi or wap).ti,ab. | 5777        |
| 5<br>6 | (bluetooth or blue tooth).ti,ab.          | 301         |
| 5<br>7 | 51 or 52 or 53 or 54 or 55 or 56          | 181808      |
| 5<br>8 | 50 and 57                                 | 2363        |
| 5<br>9 | 43 or 58                                  | 7437        |
| 6<br>0 | 13 and 59                                 | 2176        |
| 6<br>1 | medline.tw.                               | 58134       |
| 6<br>2 | meta-analys*.mp.                          | 96408       |
| 6<br>3 | search*.tw.                               | 253490      |
| 6<br>4 | review.pt.                                | 191829<br>2 |
| 6<br>5 | 61 or 62 or 63 or 64                      | 214992<br>8 |

|   |                 |        |
|---|-----------------|--------|
| 6 | 60 and 65       | 312    |
| 6 |                 |        |
| 6 | 2011*.dp,em,yr. | 140105 |
| 7 |                 | 8      |
| 6 | 66 and 67       | 39     |
| 8 |                 |        |

**Global Health (OvidSP) (1973 - ) – 7<sup>th</sup> June 2012 & 11<sup>th</sup> December 2012**

|   |                                                                                                     |      |
|---|-----------------------------------------------------------------------------------------------------|------|
| 1 | exp health care workers/                                                                            | 2442 |
|   |                                                                                                     | 3    |
| 2 | clinician*1.ti,ab.                                                                                  | 9751 |
| 3 | (clinical adj3 (staff or personnel or officer*1 or worker*1)).ti,ab.                                | 552  |
| 4 | (medical adj3 (staff or personnel or officer*1 or worker*1 or professional*)).ti,ab.                | 3745 |
| 5 | ((health or healthcare) adj3 (staff or personnel or officer* or worker*1 or professional*1)).ti,ab. | 2143 |
|   |                                                                                                     | 0    |
| 6 | (physician*1 or doctor*1 or surgeon*1).ti,ab.                                                       | 3073 |
|   |                                                                                                     | 9    |
| 7 | nurse*1.ti,ab.                                                                                      | 9889 |
| 8 | practitioner*1.ti,ab.                                                                               | 1115 |
|   |                                                                                                     | 1    |
| 9 | (physical therapist*1 or physiotherapist*1).ti,ab.                                                  | 265  |
| 1 | rehabilitation therapist*1.ti,ab.                                                                   | 5    |
| 0 |                                                                                                     |      |
| 1 | occupational therapist*1.ti,ab.                                                                     | 76   |
| 1 |                                                                                                     |      |
| 2 | ((speech or language) adj3 therapist*).ti,ab.                                                       | 33   |
| 1 | 1 or 2 or 3 or 4 or 5 or 6 or 7 or 8 or 9 or 10 or 11 or 12                                         | 8056 |

|   |                                                                    |    |
|---|--------------------------------------------------------------------|----|
| 3 |                                                                    | 4  |
| 1 | (mhealth* or m-health* or mobile health*).ti,ab.                   | 88 |
| 4 |                                                                    |    |
| 1 | (handheld adj3 (device* or computer* or technolog* or PC)).ti,ab.  | 79 |
| 5 |                                                                    |    |
| 1 | (hand-held adj3 (device* or computer* or technolog* or PC)).ti,ab. | 54 |
| 6 |                                                                    |    |
| 1 | (tablet adj3 (device* or computer* or technolog* or PC)).ti,ab.    | 10 |
| 7 |                                                                    |    |
| 1 | (slate adj3 tablet*).ti,ab.                                        | 0  |
| 8 |                                                                    |    |
| 1 | (android adj3 tablet*).ti,ab.                                      | 0  |
| 9 |                                                                    |    |
| 2 | (palm*1 adj3 (device* or computer* or pc)).ti,ab.                  | 9  |
| 0 |                                                                    |    |
| 2 | (pocket* adj3 (device* or computer* or pc)).ti,ab.                 | 13 |
| 1 |                                                                    |    |
| 2 | (mobile adj3 (computer* or PC)).ti,ab.                             | 23 |
| 2 |                                                                    |    |
| 2 | (portable adj3 (computer* or PC)).ti,ab.                           | 17 |
| 3 |                                                                    |    |
| 2 | (palm pilot* or palmpilot*).ti,ab.                                 | 1  |
| 4 |                                                                    |    |
| 2 | (smartbook* or smart-book*).ti,ab.                                 | 0  |
| 5 |                                                                    |    |
| 2 | ipad*.ti,ab.                                                       | 23 |
| 6 |                                                                    |    |
| 2 | i-pad*.ti,ab.                                                      | 2  |
| 7 |                                                                    |    |
| 2 | galaxy tab.ti,ab.                                                  | 0  |
| 8 |                                                                    |    |
| 2 | kindle fire.ti,ab.                                                 | 0  |

|        |                                                                                        |     |
|--------|----------------------------------------------------------------------------------------|-----|
| 9      |                                                                                        |     |
| 3<br>0 | playbook.ti,ab.                                                                        | 5   |
| 3<br>1 | ((touchscreen or touch screen) adj3 (computer* or PC or technolog* or device*)).ti,ab. | 25  |
| 3<br>2 | (smartphone* or smart phone*).ti,ab.                                                   | 23  |
| 3<br>3 | iphone*.ti,ab.                                                                         | 7   |
| 3<br>4 | i-phone*.ti,ab.                                                                        | 1   |
| 3<br>5 | (blackberry or black-berry).ti,ab.                                                     | 205 |
| 3<br>6 | (android adj3 (phone* or cellphone* or telephone* or device* or mobile*)).ti,ab.       | 0   |
| 3<br>7 | (google adj3 (phone* or cellphone* or telephone* or device* or mobile*)).ti,ab.        | 0   |
| 3<br>8 | (nexus one adj3 (phone* or cellphone* or telephone* or device* or mobile*)).ti,ab.     | 0   |
| 3<br>9 | (google adj3 android).ti,ab.                                                           | 0   |
| 4<br>0 | (ipod touch or i-pod touch).ti,ab.                                                     | 2   |
| 4<br>1 | ((touchscreen or touch screen) adj3 (phone* or cellphone* or telephone*)).ti,ab.       | 0   |
| 4<br>2 | apps.ti.                                                                               | 6   |
| 4<br>3 | or/14-42                                                                               | 568 |
| 4<br>4 | ((cell or cellular) adj3 (phone* or telephone*)).ti,ab.                                | 295 |
| 4      | cellphone*.ti,ab.                                                                      | 9   |

|   |                                                                      |      |
|---|----------------------------------------------------------------------|------|
| 5 |                                                                      |      |
| 4 | (mobile adj3 (phone* or telephone* or device* or technolog*)).ti,ab. | 633  |
| 6 |                                                                      |      |
| 4 | digital assistant*.ti,ab.                                            | 108  |
| 7 |                                                                      |      |
| 4 | pda*.ti,ab.                                                          | 838  |
| 8 |                                                                      |      |
| 4 | 44 or 45 or 46 or 47 or 48                                           | 1742 |
| 9 |                                                                      |      |
| 5 | internet.ti,ab.                                                      | 3881 |
| 0 |                                                                      |      |
| 5 | (online or on-line).ti,ab.                                           | 5145 |
| 1 |                                                                      |      |
| 5 | (web* or www).ti,ab.                                                 | 7140 |
| 2 |                                                                      |      |
| 5 | (wireless or wifi or wi-fi or wap).ti,ab.                            | 212  |
| 3 |                                                                      |      |
| 5 | (bluetooth or blue tooth).ti,ab.                                     | 11   |
| 4 |                                                                      |      |
| 5 | 50 or 51 or 52 or 53 or 54                                           | 1441 |
| 5 |                                                                      | 6    |
| 5 | 49 and 55                                                            | 210  |
| 6 |                                                                      |      |
| 5 | 43 or 56                                                             | 758  |
| 7 |                                                                      |      |
| 5 | 13 and 57                                                            | 100  |
| 8 |                                                                      |      |
| 5 | meta-analysis.tw.                                                    | 8355 |
| 9 |                                                                      |      |
| 6 | search*.tw.                                                          | 2416 |
| 0 |                                                                      | 5    |
| 6 | systematic review.tw.                                                | 6685 |

|   |                |      |
|---|----------------|------|
| 1 |                |      |
| 6 | 59 or 60 or 61 | 3127 |
| 2 |                | 6    |
| 6 | 58 and 62      | 4    |
| 3 |                |      |

**Medline (OvidSP) (1946 - , In process) – 7<sup>th</sup> June 2012 & 11<sup>th</sup> December 2012**

|    |                                                                                                     |        |
|----|-----------------------------------------------------------------------------------------------------|--------|
| 1  | exp Health Personnel/                                                                               | 348969 |
| 2  | exp health occupations/                                                                             | 126546 |
| 3  | clinician*1.ti,ab.                                                                                  | 0      |
| 4  | (clinical adj3 (staff or personnel or officer*1 or worker*1)).ti,ab.                                | 111946 |
| 5  | (medical adj3 (staff or personnel or officer*1 or worker*1 or professional*)).ti,ab.                | 3987   |
| 6  | ((health or healthcare) adj3 (staff or personnel or officer* or worker*1 or professional*1)).ti,ab. | 24979  |
| 7  | (physician*1 or doctor*1 or surgeon*1).ti,ab.                                                       | 83154  |
| 8  | nurse*1.ti,ab.                                                                                      | 438274 |
| 9  | practitioner*1.ti,ab.                                                                               | 175531 |
| 10 | (physical therapist*1 or physiotherapist*1).ti,ab.                                                  | 90502  |
| 11 | rehabilitation therapist*1.ti,ab.                                                                   | 7001   |
| 12 | occupational therapist*1.ti,ab.                                                                     | 104    |
| 13 | ((speech or language) adj3 therapist*).ti,ab.                                                       | 3976   |
| 14 | 1 or 2 or 3 or 4 or 5 or 6 or 7 or 8 or 9 or 10 or 11 or 12 or 13                                   | 1253   |
|    |                                                                                                     | 204447 |
|    |                                                                                                     | 3      |

|        |                                                                    |      |
|--------|--------------------------------------------------------------------|------|
| 1<br>5 | Computers, Handheld/                                               | 1927 |
| 1<br>6 | (mhealth* or m-health* or mobile health*).ti,ab.                   | 411  |
| 1<br>7 | (handheld adj3 (device* or computer* or technolog* or PC)).ti,ab.  | 846  |
| 1<br>8 | (hand-held adj3 (device* or computer* or technolog* or PC)).ti,ab. | 693  |
| 1<br>9 | (tablet adj3 (device* or computer* or technolog* or PC)).ti,ab.    | 277  |
| 2<br>0 | (slate adj3 tablet*).ti,ab.                                        | 3    |
| 2<br>1 | (android adj3 tablet*).ti,ab.                                      | 1    |
| 2<br>2 | (palm*1 adj3 (device* or computer* or pc)).ti,ab.                  | 125  |
| 2<br>3 | (pocket* adj3 (device* or computer* or pc)).ti,ab.                 | 297  |
| 2<br>4 | (mobile adj3 (computer* or PC)).ti,ab.                             | 192  |
| 2<br>5 | (portable adj3 (computer* or PC)).ti,ab.                           | 343  |
| 2<br>6 | (palm pilot* or palmpilot*).ti,ab.                                 | 46   |
| 2<br>7 | (smartbook* or smart-book*).ti,ab.                                 | 2    |
| 2<br>8 | ipad*.ti,ab.                                                       | 240  |
| 2<br>9 | i-pad*.ti,ab.                                                      | 19   |
| 3<br>0 | galaxy tab.ti,ab.                                                  | 0    |

|        |                                                                                        |      |
|--------|----------------------------------------------------------------------------------------|------|
| 3<br>1 | kindle fire.ti,ab.                                                                     | 0    |
| 3<br>2 | playbook.ti,ab.                                                                        | 29   |
| 3<br>3 | ((touchscreen or touch screen) adj3 (computer* or PC or technolog* or device*)).ti,ab. | 261  |
| 3<br>4 | (smartphone* or smart phone*).ti,ab.                                                   | 430  |
| 3<br>5 | iphone*.ti,ab.                                                                         | 129  |
| 3<br>6 | i-phone*.ti,ab.                                                                        | 5    |
| 3<br>7 | (blackberry or black-berry).ti,ab.                                                     | 258  |
| 3<br>8 | (android adj3 (phone* or cellphone* or telephone* or device* or mobile*)).ti,ab.       | 15   |
| 3<br>9 | (google adj3 (phone* or cellphone* or telephone* or device* or mobile*)).ti,ab.        | 3    |
| 4<br>0 | (nexus one adj3 (phone* or cellphone* or telephone* or device* or mobile*)).ti,ab.     | 0    |
| 4<br>1 | (google adj3 android).ti,ab.                                                           | 2    |
| 4<br>2 | (ipod touch or i-pod touch).ti,ab.                                                     | 30   |
| 4<br>3 | ((touchscreen or touch screen) adj3 (phone* or cellphone* or telephone*)).ti,ab.       | 4    |
| 4<br>4 | apps.ti.                                                                               | 80   |
| 4<br>5 | or/15-44                                                                               | 5635 |
| 4<br>6 | Cellular Phone/                                                                        | 3339 |

|        |                                                                      |        |
|--------|----------------------------------------------------------------------|--------|
| 4<br>7 | ((cell or cellular) adj3 (phone* or telephone*)).ti,ab.              | 1724   |
| 4<br>8 | cellphone*.ti,ab.                                                    | 44     |
| 4<br>9 | (mobile adj3 (phone* or telephone* or device* or technolog*)).ti,ab. | 3474   |
| 5<br>0 | digital assistant*.ti,ab.                                            | 853    |
| 5<br>1 | pda*.ti,ab.                                                          | 7026   |
| 5<br>2 | 46 or 47 or 48 or 49 or 50 or 51                                     | 13046  |
| 5<br>3 | exp Internet/                                                        | 43923  |
| 5<br>4 | Software/                                                            | 71363  |
| 5<br>5 | Wireless Technology/                                                 | 464    |
| 5<br>6 | internet.ti,ab.                                                      | 24539  |
| 5<br>7 | (online or on-line).ti,ab.                                           | 48022  |
| 5<br>8 | (web* or www).ti,ab.                                                 | 60223  |
| 5<br>9 | (wireless or wifi or wi-fi or wap).ti,ab.                            | 5212   |
| 6<br>0 | (bluetooth or blue tooth).ti,ab.                                     | 248    |
| 6<br>1 | 53 or 54 or 55 or 56 or 57 or 58 or 59 or 60                         | 200166 |
| 6<br>2 | 52 and 61                                                            | 2009   |

|        |                      |             |
|--------|----------------------|-------------|
| 6<br>3 | 45 or 62             | 6971        |
| 6<br>4 | 14 and 63            | 2598        |
| 6<br>5 | meta-analysis.mp.pt. | 61991       |
| 6<br>6 | review.pt.           | 175927<br>1 |
| 6<br>7 | search*.tw.          | 208914      |
| 6<br>8 | 65 or 66 or 67       | 192658<br>1 |
| 6<br>9 | 64 and 68            | 286         |
| 7<br>0 | 2012*.dp,yr,ed.      | 132714<br>4 |
| 7<br>1 | 69 and 70            | 55          |

**PsycINFO** (OvidSP) (1967 - ) – 7<sup>th</sup> June 2012 & 11<sup>th</sup> December 2012

|   |                                                                                                     |            |
|---|-----------------------------------------------------------------------------------------------------|------------|
| 1 | exp health personnel/ or exp therapists/ or clinicians/                                             | 10238<br>7 |
| 2 | clinician*1.ti,ab.                                                                                  | 51967      |
| 3 | (clinical adj3 (staff or personnel or officer*1 or worker*1)).ti,ab.                                | 1897       |
| 4 | (medical adj3 (staff or personnel or officer*1 or worker*1 or professional*)).ti,ab.                | 5341       |
| 5 | ((health or healthcare) adj3 (staff or personnel or officer* or worker*1 or professional*1)).ti,ab. | 34941      |

|    |                                                                    |        |
|----|--------------------------------------------------------------------|--------|
| 6  | (physician*1 or doctor*1 or surgeon*1).ti,ab.                      | 54952  |
| 7  | nurse*1.ti,ab.                                                     | 35733  |
| 8  | practitioner*1.ti,ab.                                              | 52500  |
| 9  | (physical therapist*1 or physiotherapist*1).ti,ab.                 | 1306   |
| 10 | rehabilitation therapist*1.ti,ab.                                  | 78     |
| 11 | occupational therapist*1.ti,ab.                                    | 3263   |
| 12 | ((speech or language) adj3 therapist*).ti,ab.                      | 1218   |
| 13 | 1 or 2 or 3 or 4 or 5 or 6 or 7 or 8 or 9 or 10 or 11 or 12        | 251500 |
| 14 | (mhealth* or m-health* or mobile health*).ti,ab.                   | 80     |
| 15 | (handheld adj3 (device* or computer* or technolog* or PC)).ti,ab.  | 360    |
| 16 | (hand-held adj3 (device* or computer* or technolog* or PC)).ti,ab. | 170    |
| 17 | (tablet adj3 (device* or computer* or technolog* or PC)).ti,ab.    | 88     |
| 18 | (slate adj3 tablet*).ti,ab.                                        | 1      |
| 19 | (android adj3 tablet*).ti,ab.                                      | 1      |
| 20 | (palm*1 adj3 (device* or computer* or pc)).ti,ab.                  | 66     |
| 21 | (pocket* adj3 (device* or computer* or pc)).ti,ab.                 | 76     |
| 22 | (mobile adj3 (computer* or PC)).ti,ab.                             | 125    |
| 23 | (portable adj3 (computer* or PC)).ti,ab.                           | 88     |

|        |                                                                                        |     |
|--------|----------------------------------------------------------------------------------------|-----|
| 2<br>4 | (palm pilot* or palmpilot*).ti,ab.                                                     | 39  |
| 2<br>5 | (smartbook* or smart-book*).ti,ab.                                                     | 0   |
| 2<br>6 | ipad*.ti,ab.                                                                           | 33  |
| 2<br>7 | i-pad*.ti,ab.                                                                          | 1   |
| 2<br>8 | galaxy tab.ti,ab.                                                                      | 0   |
| 2<br>9 | kindle fire.ti,ab.                                                                     | 0   |
| 3<br>0 | playbook.ti,ab.                                                                        | 17  |
| 3<br>1 | ((touchscreen or touch screen) adj3 (computer* or PC or technolog* or device*)).ti,ab. | 151 |
| 3<br>2 | (smartphone* or smart phone*).ti,ab.                                                   | 162 |
| 3<br>3 | iphone*.ti,ab.                                                                         | 52  |
| 3<br>4 | i-phone*.ti,ab.                                                                        | 8   |
| 3<br>5 | (blackberry or black-berry).ti,ab.                                                     | 24  |
| 3<br>6 | (android adj3 (phone* or cellphone* or telephone* or device* or mobile*)).ti,ab.       | 4   |
| 3<br>7 | (google adj3 (phone* or cellphone* or telephone* or device* or mobile*)).ti,ab.        | 2   |
| 3<br>8 | (nexus one adj3 (phone* or cellphone* or telephone* or device* or mobile*)).ti,ab.     | 0   |
| 3<br>9 | (google adj3 android).ti,ab.                                                           | 2   |

|        |                                                                                  |       |
|--------|----------------------------------------------------------------------------------|-------|
| 4<br>0 | (ipod touch or i-pod touch).ti,ab.                                               | 14    |
| 4<br>1 | ((touchscreen or touch screen) adj3 (phone* or cellphone* or telephone*)).ti,ab. | 3     |
| 4<br>2 | apps.ti.                                                                         | 11    |
| 4<br>3 | or/14-42                                                                         | 1412  |
| 4<br>4 | cellular phones/                                                                 | 1199  |
| 4<br>5 | ((cell or cellular) adj3 (phone* or telephone*)).ti,ab.                          | 948   |
| 4<br>6 | cellphone*.ti,ab.                                                                | 36    |
| 4<br>7 | (mobile adj3 (phone* or telephone* or device* or technolog*)).ti,ab.             | 1934  |
| 4<br>8 | digital assistant*.ti,ab.                                                        | 336   |
| 4<br>9 | pda*.ti,ab.                                                                      | 726   |
| 5<br>0 | 44 or 45 or 46 or 47 or 48 or 49                                                 | 3727  |
| 5<br>1 | Internet/                                                                        | 18888 |
| 5<br>2 | internet.ti,ab.                                                                  | 18585 |
| 5<br>3 | (online or on-line).ti,ab.                                                       | 27255 |
| 5<br>4 | (web* or www).ti,ab.                                                             | 24331 |
| 5<br>5 | (wireless or wifi or wi-fi or wap).ti,ab.                                        | 757   |

|        |                                  |            |
|--------|----------------------------------|------------|
| 5<br>6 | (bluetooth or blue tooth).ti,ab. | 31         |
| 5<br>7 | 51 or 52 or 53 or 54 or 55 or 56 | 59463      |
| 5<br>8 | 50 and 57                        | 1006       |
| 5<br>9 | 43 or 58                         | 2271       |
| 6<br>0 | 13 and 59                        | 255        |
| 6<br>1 | meta-analysis.tw.                | 12265      |
| 6<br>2 | effectiveness.tw.                | 95254      |
| 6<br>3 | search*.tw.                      | 52624      |
| 6<br>4 | 61 or 62 or 63                   | 15413<br>1 |
| 6<br>5 | 60 and 64                        | 40         |
| 6<br>6 | 2012*.dp,yr,up.                  | 18293<br>9 |
| 6<br>7 | 65 and 66                        | 10         |
